# Supplementary material for: Non-linear relationship between the atherogenic index of plasma and ischemic stroke in the diabetic population in ICU: A multicenter retrospective cohort study
Source: Research Square preprint supplement (doi:10.21203/rs.3.rs-5638991/v1), 2024-12-25
Supplement: Supplementary file 1 [file f32415d6869b3e44ccff7a70.docx]

Supplementary data

**Non-linear relationship between the atherogenic index of plasma and ischemic stroke in the diabetic population in ICU: A multicenter retrospective cohort study**

Liling Wu1,2, Zhihang Su1,2, Xingling Chen3,4, Haofei Hu1,2*, Qijun Wan1,2*

1Department of Nephrology, The First Affiliated Hospital of Shenzhen University, Shenzhen 518000, Guangdong Province, China.

2Department of Nephrology, Shenzhen Second People’s Hospital, Shenzhen 518000, Guangdong Province, China.

3Department of Geriatrics, Union Hospital, Tongji Medical College, Huazhong University of Science and Technology, Wuhan, P. R.China.

4Department of Epidemiology and Biostatistics, Empower U, X&Y Solutions Inc., Boston, USA.

Full list of author information is available at the end of the article.

*Correspondence: [yiyuan2224@sina.com](mailto:yiyuan2224@sina.com) and huhaofei0319@126.com.

**Table S1. The results of univariate analysis**

| Variable | Statistics | OR(95%CI) *P* value |
| --- | --- | --- |
| Age,years | 65.1 ± 13.7 | 1.0 (1.0, 1.0) <0.001 |
| Gender |  |  |
| Male | 2187 (59.2%) | Ref. |
| Female | 1508 (40.8%) | 1.2 (1.0, 1.4) 0.057 |
| BMI(kg/m2) | 30.5 ± 11.0 | 1.0 (1.0, 1.0) 0.061 |
| Ethnicity(%) |  |  |
| Black | 546 (14.9%) | Ref. |
| Asian | 77 (2.1%) | 1.0 (0.5, 1.7) 0.868 |
| Caucasian | 2380 (65.0%) | 0.9 (0.7, 1.1) 0.362 |
| Hispanic | 371 (10.1%) | 0.8 (0.6, 1.1) 0.157 |
| White | 19 (0.5%) | 0.2 (0.0, 1.5) 0.121 |
| Other | 271 (7.4%) | 0.7 (0.5, 1.0) 0.039 |
| Comorbid conditions(%) |  |  |
| Ketoacidosis | 201 (5.4%) | 0.2 (0.1, 0.3) <0.001 |
| Hypertension | 1726 (46.7%) | 3.1 (2.6, 3.7) <0.001 |
| ARF | 675 (18.3%) | 1.4 (1.2, 1.7) <0.001 |
| COPD | 419 (11.3%) | 0.6 (0.4, 0.8) <0.001 |
| AMI | 636 (17.2%) | 0.2 (0.1, 0.3) <0.001 |
| AF | 540 (14.6%) | 1.6 (1.3, 2.0) <0.001 |
| Cardiac arrest | 160 (4.3%) | 0.5 (0.3, 0.8) 0.005 |
| CHF | 713 (19.3%) | 0.5 (0.4, 0.6) <0.001 |
| GB | 40 (1.1%) | 0.3 (0.1, 1.1) 0.065 |
| CKD | 146 (4.0%) | 1.3 (0.9, 1.9) 0.234 |
| ESRD | 223 (6.0%) | 0.7 (0.5, 1.1) 0.102 |
| Sepsis | 381 (10.3%) | 0.5 (0.3, 0.6) <0.001 |
| Cancer | 41 (1.1%) | 0.3 (0.1, 1.1) 0.061 |
| Laboratory data |  |  |
| Hb(g/dL) | 13.0 ± 5.9 | 1.0 (1.0, 1.0) 0.668 |
| Platelet(10^9/L) | 232.8 ± 93.9 | 1.0 (1.0, 1.0) 0.501 |
| ALB(g/dL) | 3.3 ± 0.7 | 1.0 (0.9, 1.2) 0.504 |
| Creatinine(mg/dL) | 1.9 ± 2.0 | 0.9 (0.8, 0.9) <0.001 |
| ALT(U/L) | 50.8 ± 175.4 | 1.0 (1.0, 1.0) 0.022 |
| Lactate(mmol/L) | 3.5 ± 8.6 | 1.0 (0.9, 1.0) 0.177 |
| Treatment |  |  |
| Mechanical ventilation | 774 (20.9%) | 1.4 (1.2, 1.7) <0.001 |
| Glucocorticoids | 243 (6.6%) | 0.6 (0.4, 0.9) 0.010 |
| Vancomycin | 301 (8.2%) | 0.6 (0.4, 0.9) 0.005 |
| Carbapenem | 62 (1.7%) | 0.8 (0.4, 1.6) 0.497 |
| Levofloxacin | 135 (3.7%) | 0.3 (0.1, 0.6) <0.001 |

Continuous data are expressed as mean+SD or median(O1--O3).

Categorical data are expressed as n(%).

One-way ANOVA.Kruskall-Wallis test or chi-square test.

BMI, body mass index; ARF,acute respiratory failure; COPD,chronic obstructive pulmonary disease; AMI.acute myocardial infarction; AF.atrial fibrillation; CHF,congestive heart failure; GB,gastrointestinal bleeding; CKD,chronic kidney disease; ESRD,end-stage renal disease; Hb,hemoglobin; ALB,serum albumin; ALT,alanine aminotransferase.

**Table S2. Relationship between AIP and stroke in participants without excluding outliers of AIP**

| Variable | Crude model (OR,95%CI, P) | Model I(OR,95%CI, P) | Model II (OR,95%CI, P) |
| --- | --- | --- | --- |
| AIP | 1.6 (1.3, 1.9) <0.001 | 1.4 (1.1, 1.7) 0.001 | 1.3 (1.0, 1.6) 0.040 |
| AIP Quintile |  |  |  |
| Q1 | 1.0 | 1.0 | 1.0 |
| Q2 | 1.3 (1.1, 1.7) 0.017 | 1.3 (1.0, 1.6) 0.057 | 1.2 (0.9, 1.5) 0.232 |
| Q3 | 1.6 (1.2, 2.0) <0.001 | 1.4 (1.1, 1.8) 0.006 | 1.3 (1.0, 1.7) 0.056 |
| Q4 | 1.8 (1.4, 2.3) <0.001 | 1.6 (1.3, 2.0) <0.001 | 1.4 (1.1, 1.8) 0.012 |
| *P* for trend | <0.001 | <0.001 | 0.009 |

Crude model: we did not adjust other covariants

Model I: we adjusted age, gender, BMI, ethnicity.

Model II: we adjusted age, gender, BMI, ethnicity; cardiac arrest; acute myocardial infarction; gastrointestinal bleeding; cancer; Antiplatelet drugs; cholesterol-lowering drug.

OR, odds ratios; CI: confidence, Ref: reference; AIP: Atherogenic index of plasma

**Table S3. The characteristics of participants between Stroke and without stroke groups.**

| Characteristic | Without stroke | Stroke | *P*-value |
| --- | --- | --- | --- |
| Participants | 2976 | 719 |  |
| Age,years | 64.2 ± 13.9 | 68.8 ± 12.2 | <0.001 |
| Gender |  |  | 0.056 |
| Male | 1784 (59.9%) | 403 (56.1%) |  |
| Female | 1192 (40.1%) | 316 (43.9%) |  |
| BMI(kg/m2) | 30.7 ± 11.4 | 29.8 ± 9.6 | 0.004 |
| Ethnicity(%) |  |  | 0.171 |
| Black | 428 (14.5%) | 118 (16.5%) |  |
| Asian | 61 (2.1%) | 16 (2.2%) |  |
| Caucasian | 1907 (64.7%) | 473 (66.1%) |  |
| Hispanic | 305 (10.3%) | 66 (9.2%) |  |
| White | 18 (0.6%) | 1 (0.1%) |  |
| Other | 229 (7.8%) | 42 (5.9%) |  |
| Comorbid conditions(%) |  |  |  |
| Ketoacidosis | 193 (6.5%) | 8 (1.1%) | <0.001 |
| Hypertension | 1232 (41.4%) | 494 (68.7%) | <0.001 |
| ARF | 512 (17.2%) | 163 (22.7%) | <0.001 |
| COPD | 366 (12.3%) | 53 (7.4%) | <0.001 |
| AMI | 601 (20.2%) | 35 (4.9%) | <0.001 |
| AF | 397 (13.3%) | 143 (19.9%) | <0.001 |
| Cardiac arrest | 143 (4.8%) | 17 (2.4%) | 0.004 |
| CHF | 633 (21.3%) | 80 (11.1%) | <0.001 |
| GB | 37 (1.2%) | 3 (0.4%) | 0.254 |
| CKD | 112 (3.8%) | 34 (4.7%) | 0.233 |
| ESRD | 189 (6.4%) | 34 (4.7%) | 0.101 |
| Sepsis | 341 (11.5%) | 40 (5.6%) | <0.001 |
| Cancer | 38 (1.3%) | 3 (0.4%) | 0.048 |
| Laboratory data |  |  |  |
| Hb(g/dL) | 13.0 ± 6.5 | 12.9 ± 2.7 | 0.001 |
| Platelet(10^9/L) | 233.3 ± 95.6 | 230.7 ± 86.6 | 0.744 |
| ALB(g/dL) | 3.3 ± 0.7 | 3.3 ± 0.6 | 0.805 |
| Creatinine(mg/dL) | 1.2 (0.9-1.9) | 1.1 (0.8-1.5) | <0.001 |
| ALT(U/L) | 27.0 (18.0-41.0) | 23.0 (16.0-35.0) | <0.001 |
| Lactate(mmol/L) | 1.9 (1.1-3.0) | 1.9 (1.2-3.0) | 0.987 |
| Treatment |  |  |  |
| Mechanical ventilation | 589 (19.8%) | 185 (25.7%) | <0.001 |
| Nitroglycerin | 378 (12.8%) | 14 (1.9%) | <0.001 |
| Glucocorticoids | 211 (7.1%) | 32 (4.5%) | 0.074 |
| Vancomycin | 261 (8.8%) | 40 (5.6%) | 0.028 |
| Carbapenem | 52 (1.7%) | 10 (1.4%) | 0.676 |
| Levofloxacin | 126 (4.2%) | 9 (1.3%) | <0.001 |

Continuous data are expressed as mean+SD or median(O1--O3).

Categorical data are expressed as n(%).

One-way ANOVA.Kruskall-Wallis test or chi-square test.

BMI, body mass index; ARF,acute respiratory failure; COPD,chronic obstructive pulmonary disease; AMI.acute myocardial infarction; AF.atrial fibrillation; CHF,congestive heart failure; GB,gastrointestinal bleeding; CKD,chronic kidney disease; ESRD,end-stage renal disease; Hb,hemoglobin; ALB,serum albumin; ALT,alanine aminotransferase.

**Table S4. The characteristics of participants on both sides of the inflection point.**

| Characteristic | <=0.8 | >0.8 | *P*-value |
| --- | --- | --- | --- |
| Participants | 796 | 2859 |  |
| Age,years | 66.6 ± 13.9 | 64.6 ± 13.6 | <0.001 |
| Gender |  |  | <0.001 |
| Male | 391 (49.1%) | 1781 (62.3%) |  |
| Female | 405 (50.9%) | 1078 (37.7%) |  |
| BMI(kg/m2) | 29.5 ± 10.8 | 30.8 ± 11.1 | <0.001 |
| Ethnicity(%) |  |  | 0.039 |
| Black | 140 (17.7%) | 398 (14.0%) |  |
| Asian | 16 (2.0%) | 60 (2.1%) |  |
| Caucasian | 475 (60.2%) | 1880 (66.3%) |  |
| Hispanic | 90 (11.4%) | 277 (9.8%) |  |
| White | 5 (0.6%) | 13 (0.5%) |  |
| Other | 63 (8.0%) | 207 (7.3%) |  |
| Comorbid conditions(%) |  |  |  |
| Ketoacidosis | 45 (5.7%) | 154 (5.4%) | 0.769 |
| Hypertension | 410 (51.5%) | 1299 (45.4%) | 0.002 |
| ARF | 142 (17.8%) | 525 (18.4%) | 0.735 |
| COPD | 81 (10.2%) | 328 (11.5%) | 0.305 |
| AMI | 131 (16.5%) | 500 (17.5%) | 0.496 |
| AF | 110 (13.8%) | 425 (14.9%) | 0.460 |
| Cardiac arrest | 24 (3.0%) | 135 (4.7%) | 0.037 |
| CHF | 153 (19.2%) | 550 (19.2%) | 0.992 |
| GB | 3 (0.4%) | 37 (1.3%) | 0.002 |
| CKD | 31 (3.9%) | 115 (4.0%) | 0.871 |
| ESRD | 46 (5.8%) | 175 (6.1%) | 0.720 |
| Sepsis | 63 (7.9%) | 313 (10.9%) | 0.013 |
| Stroke | 190 (23.9%) | 523 (18.3%) | <0.001 |
| Cancer | 3 (0.4%) | 37 (1.3%) | 0.028 |
| Laboratory data |  |  |  |
| Hb(g/dL) | 12.7 ± 3.5 | 13.0 ± 6.5 | 0.434 |
| Platelet(10^9/L) | 238.0 ± 85.9 | 231.2 ± 95.7 | 0.008 |
| ALB(g/dL) | 3.4 ± 0.6 | 3.2 ± 0.7 | <0.001 |
| Creatinine(mg/dL) | 1.1 (0.9-1.7) | 1.2 (0.9-1.9) | <0.001 |
| ALT(U/L) | 24.0 (18.0-36.8) | 27.0 (18.0-41.0) | 0.029 |
| Lactate(mmol/L) | 1.9 (1.1-2.8) | 1.9 (1.2-3.0) | 0.989 |
| Treatment |  |  |  |
| Mechanical ventilation | 209 (26.3%) | 557 (19.5%) | <0.001 |
| Nitroglycerin | 104 (13.1%) | 287 (10.1%) | 0.616 |
| Glucocorticoids | 63 (7.9%) | 176 (6.2%) | 0.111 |
| Vancomycin | 46 (5.8%) | 252 (8.9%) | 0.028 |
| Carbapenem | 10 (1.3%) | 50 (1.7%) | 0.128 |
| Levofloxacin | 27 (3.4%) | 107 (3.7%) | 0.642 |

Continuous data are expressed as mean+SD or median(O1--O3).

Categorical data are expressed as n(%).

One-way ANOVA.Kruskall-Wallis test or chi-square test.

BMI, body mass index; ARF,acute respiratory failure; COPD,chronic obstructive pulmonary disease; AMI.acute myocardial infarction; AF.atrial fibrillation; CHF,congestive heart failure; GB,gastrointestinal bleeding; CKD,chronic kidney disease; ESRD,end-stage renal disease; Hb,hemoglobin; ALB,serum albumin; ALT,alanine aminotransferase.
